# Supplementary material
Source: PubMed Central journal article supplement (PMC2646189)
Supplement: 97320630003198S1.pdf [file 97320630003198S1.pdf]

### Supplementary material

| CYP family | Function                                                      | Category                                       | CYP Isoform                                                                                                                                         |
|------------|---------------------------------------------------------------|------------------------------------------------|-----------------------------------------------------------------------------------------------------------------------------------------------------|
| CYP1       | Drug and steroid (especially estrogen) metabolism             | 3 subfamilies,<br>3 genes,<br>1 pseudogene     | CYP1A1<br>CYP1A2<br>CYP1B1                                                                                                                          |
| CYP2       | Drug and steroid metabolism                                   | 13 subfamilies,<br>16 genes,<br>16 pseudogenes | CYP2A6 CYP2A7 CYP2A13<br>CYP2B6<br>CYP2C8<br>CYP2C9 CYP2C18 CYP2C19<br>CYP2D6<br>CYP2E1<br>CYP2F1<br>CYP2J2<br>CYP2R1<br>CYP2S1<br>CYP2U1<br>CYP2W1 |
| CYP3       | Drug and steroid (including testosterone) metabolism          | 1 subfamily,<br>4 genes,<br>2 pseudogenes      | CYP3A4 CYP3A5 CYP3A7<br>CYP3A43                                                                                                                     |
| CYP4       | Arachidonic acid or fatty acid metabolism                     | 6 subfamilies,<br>11 genes,<br>10 pseudogenes  | CYP4A11 CYP4A22 CYP4B1<br>CYP4F2<br>CYP4F3<br>CYP4F8 CYP4F11 CYP4F12<br>CYP4F22 CYP4V2 CYP4X1<br>CYP4Z1                                             |
| CYP5       | Thromboxane A2 synthase                                       | 1 subfamily,<br>1 gene                         | CYP5A1                                                                                                                                              |
| CYP7       | Bile acid biosynthesis 7-alpha hydroxylase of steroid nucleus | 2 subfamilies,<br>2 genes                      | CYP7A1<br>CYP7B1                                                                                                                                    |
| CYP8       | Varied                                                        | 2 subfamilies,<br>2 genes                      | CYP8A1 (prostacyclin synthase),<br>CYP8B1 (bile acid biosynthesis)                                                                                  |
| CYP11      | Steroid biosynthesis                                          | 2 subfamilies,<br>3 genes                      | CYP11A1 CYP11B1 CYP11B2                                                                                                                             |
| CYP17      | Steroid biosynthesis, 17-alpha hydroxylase                    | 1 subfamily,<br>1 gene                         | CYP17A1                                                                                                                                             |
| CYP19      | Steroid biosynthesis: aromatase synthesizes estrogen          | 1 subfamily,<br>1 gene                         | CYP19A1                                                                                                                                             |
| CYP20      | Unknown function                                              | 1 subfamily,<br>1 gene                         | CYP20A1                                                                                                                                             |
| CYP21      | Steroid biosynthesis                                          | 2 subfamilies,<br>2 genes,<br>1 pseudogene     | CYP21A2                                                                                                                                             |
| CYP24      | Vitamin d degradation                                         | 1 subfamily,<br>1 gene                         | CYP24A1                                                                                                                                             |
| CYP26      | Retinoic acid hydroxylase                                     | 3 Subfamilies,<br>3 genes                      | CYP26A1 CYP26B1 CYP26C1                                                                                                                             |

|       |                                                |                                          |                                                                                                                                      |
|-------|------------------------------------------------|------------------------------------------|--------------------------------------------------------------------------------------------------------------------------------------|
| CYP27 | Varied                                         | 3 subfamilies,<br>3 genes                | CYP27A1 (bile acid biosynthesis),<br>CYP27B1 (vitamin D3 1-alpha<br>hydroxylase, activates vitamin D3)<br>CYP27C1 (unknown function) |
| CYP39 | 7-alpha hydroxylation of 24-hydroxycholesterol | 1 subfamily,<br>1 gene                   | CYP39A1                                                                                                                              |
| CYP46 | Cholesterol 24-hydroxylase                     | 1 subfamily,<br>1 gene                   | CYP46A1                                                                                                                              |
| CYP51 | Cholesterol biosynthesis                       | 1 subfamily,<br>1 gene,<br>3 pseudogenes | CYP51A1 (lanosterol 14-alpha<br>demethylase)                                                                                         |

**Table 1:** Classification of the CYP family on the basis of CYP isoform and function is given.

| S. No. | Name of medicinal plant                            | Herbal component and Chemical formula | IUPAC name                                                                                                                                                         | PubChem CID* |
|--------|----------------------------------------------------|---------------------------------------|--------------------------------------------------------------------------------------------------------------------------------------------------------------------|--------------|
| 1.     | St. John's wort<br>( <i>Hypericum perforatum</i> ) | Hyperforin<br>$C_{35}H_{52}O_4$       | 4-Hydroxy-5-isobutyryl-6-methyl-1,3,7-tris-(3-methyl-but-2-enyl)-6-(4-methyl-pent-3-enyl)-bicyclo[3.3.1]non-3-ene-2,9-dione                                        | 5288591      |
| 2.     | Garlic<br>( <i>Allium sativum</i> )                | Allicin<br>$C_6H_{10}OS_2$            | 3-prop-2-enylsulfanylprop-1-ene                                                                                                                                    | 65036        |
| 3.     | Piperine<br>( <i>Piper nigrum</i> )                | Piperine<br>$C_{17}H_{19}NO_3$        | (2E,4E)-5-(1,3-benzodioxol-5-yl)-1-piperidin-1-ylpenta-2,4-dien-1-one                                                                                              | 638024       |
| 4.     | Ginseng<br>( <i>Panax ginseng</i> )                | Ginsenoside<br>$C_{30}H_{52}O_2$      | (3S,5R,8R,9R,10R,14R,17S)-17-(2-hydroxy-6-methylhept-5-en-2-yl)-4,4,8,10,14-pentamethyl-2,3,5,6,7,9,11,12,13,15,16,17-dodecahydro-1H-cyclopenta[a]phenanthren-3-ol | 3086007      |
| 5.     | Ginkgo<br>( <i>Ginkgo biloba</i> )                 | Ginkgolic acid<br>$C_{22}H_{34}O_3$   | 2-hydroxy-6-[(Z)-pentadec-8-enyl]benzoic acid                                                                                                                      | 5281858      |

**Table 2:** Medicinal plants with their herbal components, IUPAC name, Chemical structure and PubChem CID number. (Note: \* = PubChem compound identity descriptor number (<http://pubchem.ncbi.nlm.nih.gov/>)).

| S. No. | Medicinal plant                                    | Herbal constituent and chemical formula | Drug        | Experimental model   | CYP enzyme involved (isoform) | Symptom of interaction                        | Mechanism                       |
|--------|----------------------------------------------------|-----------------------------------------|-------------|----------------------|-------------------------------|-----------------------------------------------|---------------------------------|
| 1.     | St. John's wort<br>( <i>Hypericum perforatum</i> ) | Hyperforin<br>$C_{35}H_{52}O_4$         | Ciclosporin | Human hepatocytes    | CYP3A4,<br>2E1, 2C19          | Reduction in serum                            | Induction of p-glycoprotein     |
| 2.     | St. John's wort<br>( <i>Hypericum perforatum</i> ) | Hyperforin<br>$C_{35}H_{52}O_4$         | Warfarn     | Human clinical trail | CYP3A4                        | Loss of anticoagulant activity                | Inhibition of CYP activity      |
| 3.     | St. John's wort<br>( <i>Hypericum perforatum</i> ) | Hyperforin<br>$C_{35}H_{52}O_4$         | Omeprazole  | Human clinical trail | CYP2C19                       | Decreases Plasma concentration                | Induction of CYP2C19, 3A4       |
| 4.     | Garlic<br>( <i>Allium sativum</i> )                | Allicin<br>$C_6H_{10}OS_2$              | Sequinavir  | Human clinical trail | CYP3A4                        | Reduction of hypertension                     | Inhibition of CYP2C9, 2C19, 3A4 |
| 5.     | Garlic<br>( <i>Allium sativum</i> )                | Allicin<br>$C_6H_{10}OS_2$              | Sequinavir  | Human clinical trail | CYP2C9,<br>2C19               | Reduction of hypertension and hyperlipidameia | Inhibition of CYP2C9, 2C19      |

|    |                                         |                                                                                |               |                                                                                       |           |                                         |                                           |
|----|-----------------------------------------|--------------------------------------------------------------------------------|---------------|---------------------------------------------------------------------------------------|-----------|-----------------------------------------|-------------------------------------------|
| 6. | Black Pepper<br>( <i>Piper nigrum</i> ) | Piperine<br>C <sub>17</sub> H <sub>19</sub> NO <sub>3</sub>                    | Antimicrobial | <i>In vivo</i> studies in rat                                                         | CYP2E1    | suppressed CYP2E1 expression            | Induce activity of CYP 1A , 2B            |
| 7. | Ginseng<br>( <i>Panax ginseng</i> )     | Ginsenoside<br>C <sub>42</sub> H <sub>72</sub> O <sub>14</sub> ,<br>Ginsenoide | Phenelzine    | <i>In vitro</i> studies in mouse and human microsomes                                 | CYP2E1    | Induce CYP3A4, 2D6, 2C19 , 2C9 activity | Inhibition of CYP2E1 activity             |
| 8. | Gingko<br>( <i>Gingko biloba</i> )      | Ginkgolic acid<br>C <sub>22</sub> H <sub>34</sub> O <sub>3</sub>               | Diltiazem     | <i>In vitro</i> and <i>in vivo</i> analysis on rat hepatic and intestinal CYP enzymes | CYP3A, 2B | Inhibit metabolism of Diltiazem (drug)  | Induces CYP2B and inhibit CYP1A2, C9 2C19 |

**Table 3:** Assessment of herbal components on drug interactions and effects on CYP activities
